# Supplementary material
Source: MDPI journal article supplement (https://www.mdpi.com/2311-5637/9/2/126)
Supplement: s1 [file s1]

**Table S1.** Details of human participants, recruited for the study and their anthropometric and clinical parameters. (M-Males, F-Females, NV- Non-vegetarian, D-Drinker, ND- Non-drinker, BMI-body mass index, GGT- Gamma-glutamyltransferase , RBS- Random blood sugar).

| Sl. no. | Age | Sex | Food habit | Drinking | Height (cm) | Weight (kg) | BMI (kg/m <sup>2</sup> ) | Pulse (BPM) | Blood pressure (mmHg) | Blood group | GGT(I U/l) | Albumin (g/dl) | Total protein (g/dl) | Globulin (g/dl) | RBS (mg/dl) |
|---------|-----|-----|------------|----------|-------------|-------------|--------------------------|-------------|-----------------------|-------------|------------|----------------|----------------------|-----------------|-------------|
| 1       | 36  | M   | NV         | ND       | 164         | 52.6        | 19.6                     | 85          | 132/55                | B+          | NA         | NA             | NA                   | NA              | NA          |
| 2       | 50  | F   | NV         | ND       | 145         | 33          | 15.7                     | 93          | 117/69                | O+          | 4.6        | 2.7            | 7.6                  | 4.9             | 108.2       |
| 3       | 45  | F   | NV         | ND       | 150         | 46.9        | 20.8                     | 87          | 121/83                | A+          | 3.8        | 3.3            | 8.7                  | 5.4             | 97.5        |
| 4       | 28  | M   | NV         | D        | 159         | 53          | 21                       | 82          | 132/72                | O+          | 2          | 3.5            | 6.7                  | 3.2             | 135         |
| 5       | 59  | M   | NV         | D        | 175         | 57          | 18.6                     | 108         | 137/112               | B+          | 5.6        | 3.1            | 6.3                  | 3.1             | 68.2        |
| 6       | 58  | M   | NV         | D        | 168         | 53.6        | 19                       | 88          | 133/92                | AB+         | 11.3       | 3.3            | 9.2                  | 6               | 105.5       |
| 7       | 26  | F   | NV         | D        | 171         | 53          | 18.1                     | 112         | 137/77                | B+          | 1          | 3.5            | 10.3                 | 6.8             | 97          |
| 8       | 59  | M   | NV         | D        | 172         | 48.8        | 16.5                     | 92          | 106/38                | A+          | 1.9        | 2.6            | 6.5                  | 3.8             | 82.4        |
| 9       | 25  | F   | NV         | ND       | 152         | 41.5        | 18                       | 88          | 104/63                | A+          | 3.1        | 2.9            | 6.9                  | 4               | 114.9       |
| 10      | 60  | M   | NV         | D        | 161         | 57          | 22                       | 81          | 151/104               | O+          | 5.8        | 3              | 8.7                  | 5.6             | 106.6       |
| 11      | 60  | M   | NV         | ND       | 152         | 46.4        | 20.1                     | 152         | 154/98                | A+          | 3.1        | 2.9            | 6.5                  | 3.6             | 91.7        |
| 12      | 36  | F   | NV         | ND       | 153         | 48          | 20.5                     | 106         | 122/58                | B+          | 1          | 2.8            | 8.4                  | 5.6             | 100.8       |
| 13      | 34  | M   | NV         | D        | 162         | 54          | 20.6                     | 106         | 136/79                | A+          | 20.7       | 3              | 8.6                  | 5.6             | 115.7       |
| 14      | 25  | M   | NV         | ND       | 165         | 50.7        | 18.6                     | 94          | 160/53                | B+          | 5.8        | 3.2            | 8.4                  | 5.2             | 63.9        |
| 15      | 26  | F   | NV         | D        | 151         | 48.4        | 21.2                     | 120         | 124/94                | A+          | 2.1        | 3.2            | 8.1                  | 4.9             | 89.5        |
| 16      | 40  | M   | NV         | ND       | 159         | 45.9        | 18.2                     | 94          | 17/70                 | A+          | 10.5       | 3              | 6.6                  | 3.6             | 107.9       |
| 17      | 40  | F   | NV         | D        | 147         | 58.2        | 26.9                     | 78          | 107/71                | B+          | 2.3        | 3.2            | 7.1                  | 3.9             | 149.6       |
| 18      | 50  | F   | NV         | D        | 149         | 42.5        | 19.3                     | 108         | 139/91                | B+          | 2          | 3              | 8.5                  | 5.5             | 101         |
| 19      | 60  | M   | NV         | D        | 158         | 59.8        | 24                       | 96          | 140/76                | B+          | 7          | 3              | 7.7                  | 4.7             | 102.3       |
| 20      | 42  | M   | NV         | D        | 162         | 49          | 18.7                     | 68          | 124/79                | B+          | 22.8       | 3.6            | 9.3                  | 5.7             | 101.1       |
| 21      | 40  | F   | NV         | ND       | 149         | 40          | 18                       | 81          | 126/72                | O+          | 1.6        | 3.2            | 8.7                  | 5.4             | 105.7       |
| 22      | 50  | F   | NV         | ND       | 146         | 41.7        | 19.6                     | 81          | 114/67                | A+          | 3.8        | 3.1            | 7.8                  | 4.7             | 87.3        |
| 23      | 27  | F   | NV         | D        | 155         | 42          | 17.5                     | 96          | 148/94                | O+          | 1.8        | 3.4            | 11.4                 | 8               | 107.1       |
| 24      | 35  | F   | NV         | ND       | 146         | 46.7        | 19.4                     | 84          | 115/91                | B+          | 2.4        | 2.8            | 5.7                  | 3               | 78.8        |
| 25      | 35  | M   | NV         | D        | 173         | 60          | 20                       | 85          | 132/77                | B+          | 12.8       | 2.7            | 7.7                  | 5               | 123.8       |
| 26      | 26  | M   | NV         | ND       | 162         | 52.7        | 20.1                     | 59          | 105/45                | AB+         | 1.8        | 3.15           | 7.51                 | 4.36            | 84.69       |
| 27      | 35  | F   | NV         | ND       | 157         | 46.7        | 18.9                     | 89          | 104/54                | A+          | NA         | NA             | NA                   | NA              | NA          |
| 28      | 28  | F   | NV         | ND       | 153         | 47.2        | 20.2                     | 80          | 120/80                | A+          | NA         | NA             | NA                   | NA              | NA          |
| 29      | 40  | M   | NV         | D        | NA          | NA          | NA                       | NA          | NA                    | NA          | NA         | NA             | NA                   | NA              | NA          |
| 30      | 40  | F   | NV         | ND       | 154         | 55.4        | 23.4                     | 96          | 120/83                | B+          | 4.93       | 3.19           | 8.94                 | 5.75            | 93.88       |
| 31      | 31  | F   | NV         | D        | 152         | 50          | 21.6                     | 83          | 120/84                | O+          | NA         | NA             | NA                   | NA              | NA          |
| 32      | 34  | F   | NV         | D        | 152         | 43.7        | 18.9                     | 90          | 139/94                | AB+         | 2.65       | 2.68           | 5.85                 | 3.18            | 65.99       |
| 33      | 35  | M   | NV         | D        | 158         | 64          | 25.6                     | 95          | 138/74                | O+          | 4.34       | 2.59           | 5.58                 | 2.98            | 98.23       |
| 34      | 28  | M   | NV         | D        | 164         | 57.2        | 21.2                     | 98          | 124/68                | B+          | 5.01       | 3.07           | 7.78                 | 4.71            | 85.28       |
| 35      | 22  | F   | NV         | ND       | 151         | 44          | 19.3                     | 88          | NA                    | NA          | NA         | NA             | NA                   | NA              | NA          |
| 36      | 35  | F   | NV         | D        | 150         | 43.6        | 19.4                     | 84          | 131/87                | A+          | 6.55       | 2.65           | 5.1                  | 2.45            | 54.88       |
| 37      | 46  | F   | NV         | ND       | 157         | 53.7        | 21.8                     | 75          | 131/76                | AB+         | 1.88       | 2.53           | 5.53                 | 3               | 70.88       |
| 38      | 60  | M   | NV         | D        | 145         | 35          | 16.6                     | 87          | 136/91                | NA          | NA         | NA             | NA                   | NA              | NA          |
| 39      | 47  | M   | NV         | D        | 180         | 63.4        | 19.6                     | 105         | 142/88                | O+          | 23.89      | 2.8            | 7.34                 | 4.54            | 94.46       |
| 40      | 23  | M   | NV         | D        | 162         | 58.4        | 22.3                     | 72          | 108/69                | AB+         | 1.09       | 2.15           | 3.59                 | 1.44            | 51.56       |
| 41      | 35  | M   | NV         | D        | 165         | 53          | 19.5                     | 108         | 113/63                | A+          | 6.44       | 2.33           | 5.59                 | 3.26            | 70.98       |
| 42      | 20  | F   | NV         | ND       | 154         | 52.3        | 22.1                     | 111         | 117/66                | B+          | 1.57       | 2.68           | 5.35                 | 2.68            | 71.6        |
| 43      | 24  | M   | NV         | ND       | 164         | 58.5        | 21.8                     | 62          | 118/63                | AB+         | 1.89       | 2.65           | 4.75                 | 2.1             | 71.55       |
| 44      | 37  | F   | NV         | D        | 157         | 56.7        | 23                       | 80          | 110/64                | O+          | 0.81       | 3.04           | 6.54                 | 3.5             | 71.43       |

|    |    |   |    |    |     |      |      |    |        |    |       |      |      |      |       |
|----|----|---|----|----|-----|------|------|----|--------|----|-------|------|------|------|-------|
| 45 | 45 | M | NV | ND | 164 | 53.1 | 19.7 | 64 | 107/63 | A+ | 5.24  | 2.86 | 5.91 | 3.05 | 66.39 |
| 46 | 43 | F | NV | ND | 152 | 42.7 | 18.5 | 93 | 101/57 | A+ | 14.64 | 2.63 | 4.8  | 2.18 | 77    |
| 47 | 27 | F | NV | D  | 153 | 48.2 | 20.6 | 75 | 108/82 | A+ | 2.4   | 3.21 | 9.37 | 6.16 | 84.13 |
| 48 | 50 | F | NV | D  | 150 | 43.2 | 19.2 | 95 | 84/48  | A+ | 3.16  | 1.25 | 2.37 | 1.11 | 77.1  |

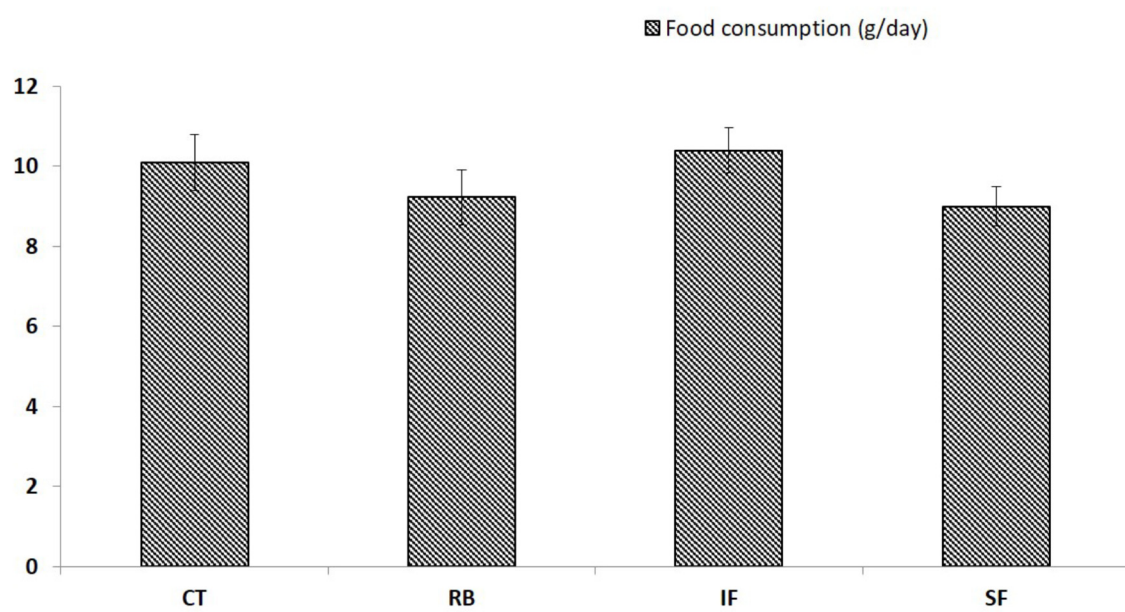

**Figure S1.** Daily diet intake of animals during the experimental period.

**A**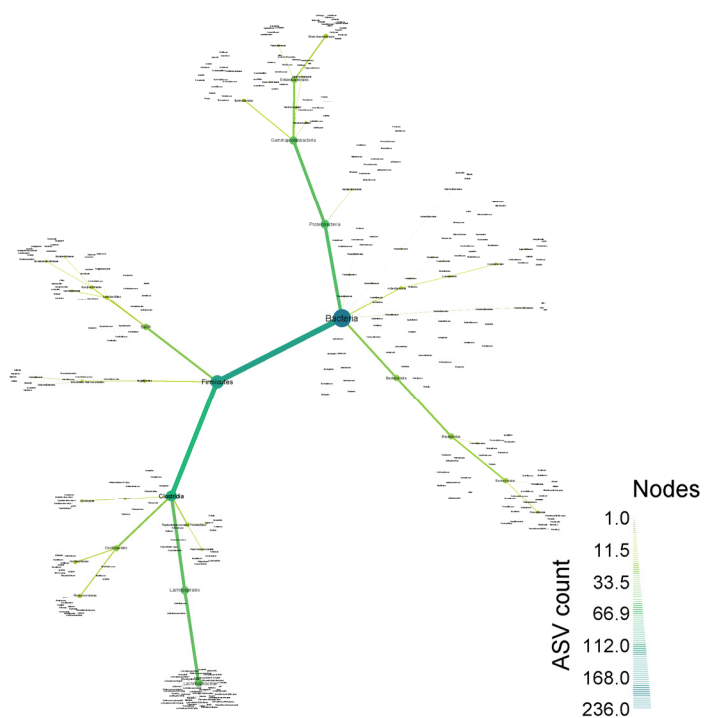**B**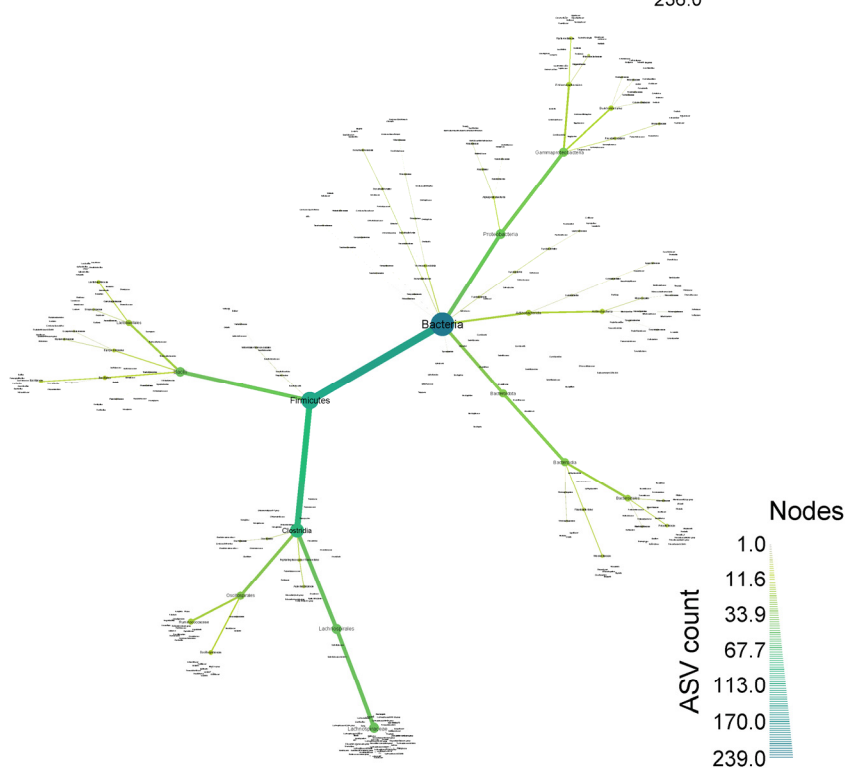

**Figure S2.** Overall diversity of bacterial genera observed in the fecal samples of (A) human, and (B) mouse fecal microbiota.

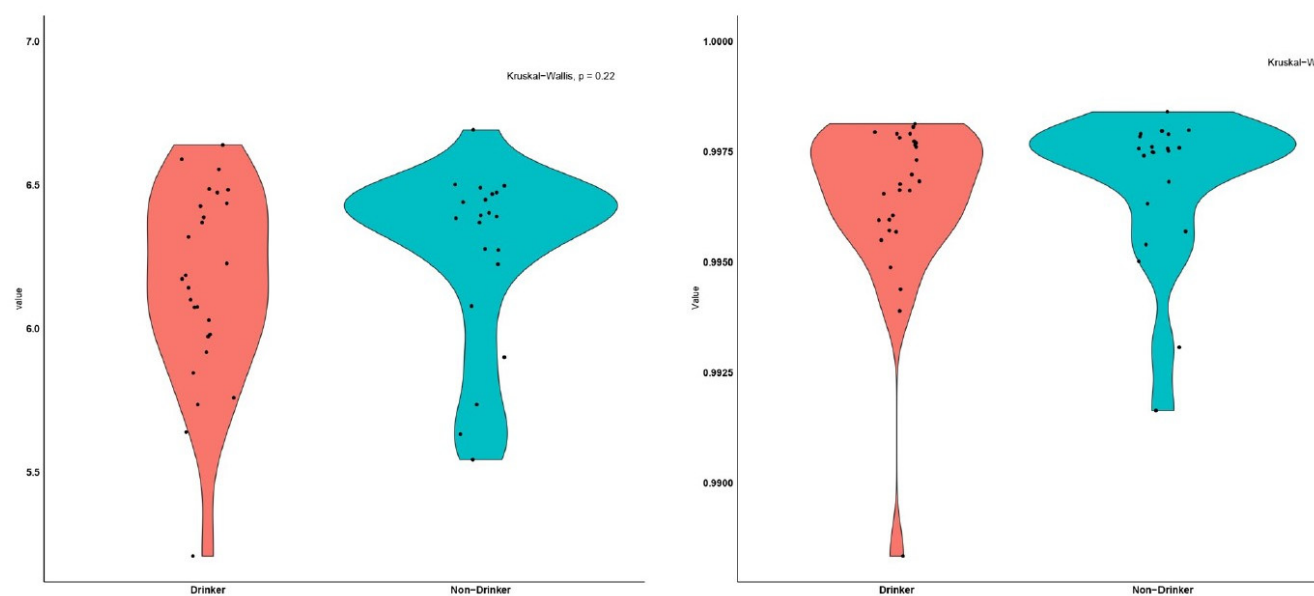

**Figure S3.** Treatment wise comparison of alpha diversity indices (A) Shannon, and (B) Simpson in human fecal samples.

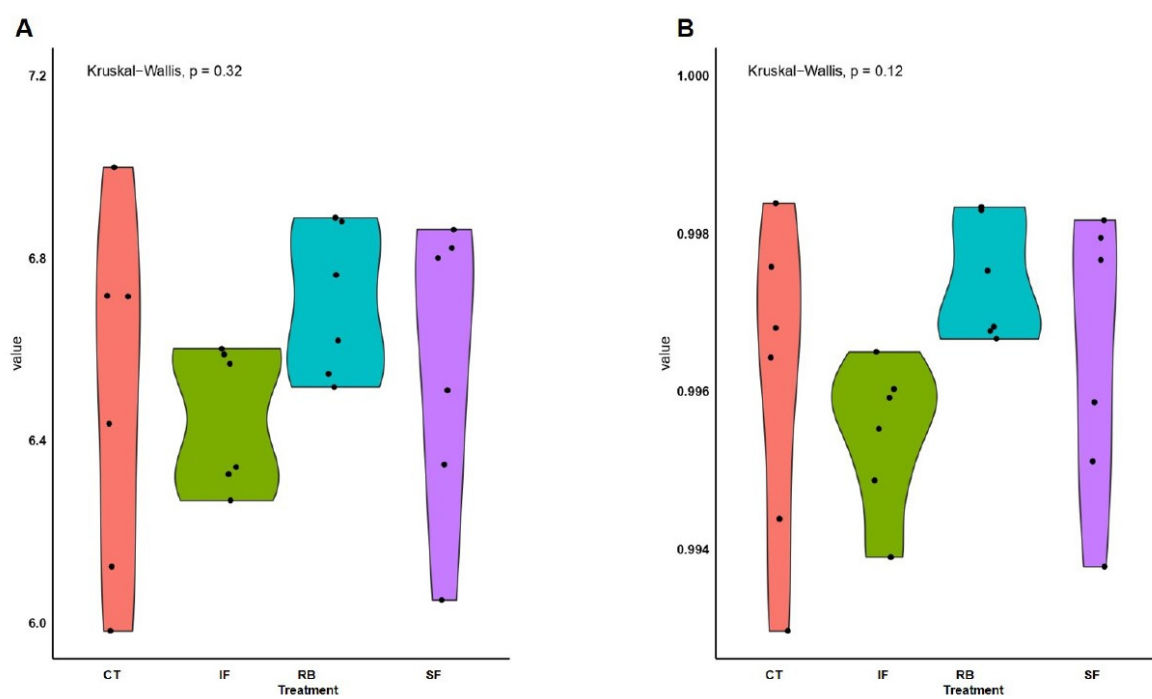

**Figure S4.** Treatment wise comparison of alpha diversity indices (A) Shannon, and (B) Simpson in mice fecal samples.
